# Supplementary figures and images for: Natural Flavonoids Quercetin and Kaempferol Targeting G2/M Cell Cycle-Related Genes and Synergize with Smac Mimetic LCL-161 to Induce Necroptosis in Cholangiocarcinoma Cells
Source: MDPI journal article supplement (doi:10.3390/nu15143090), 2023-07-10

A.

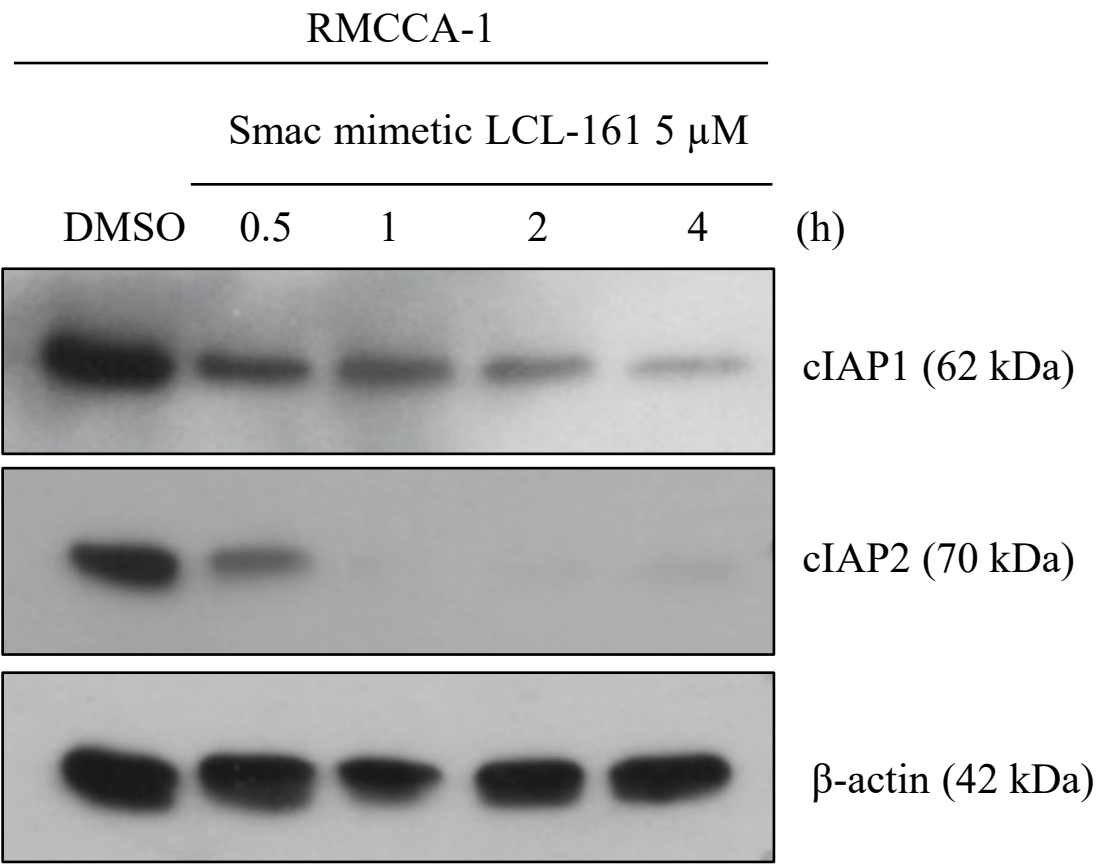

B.

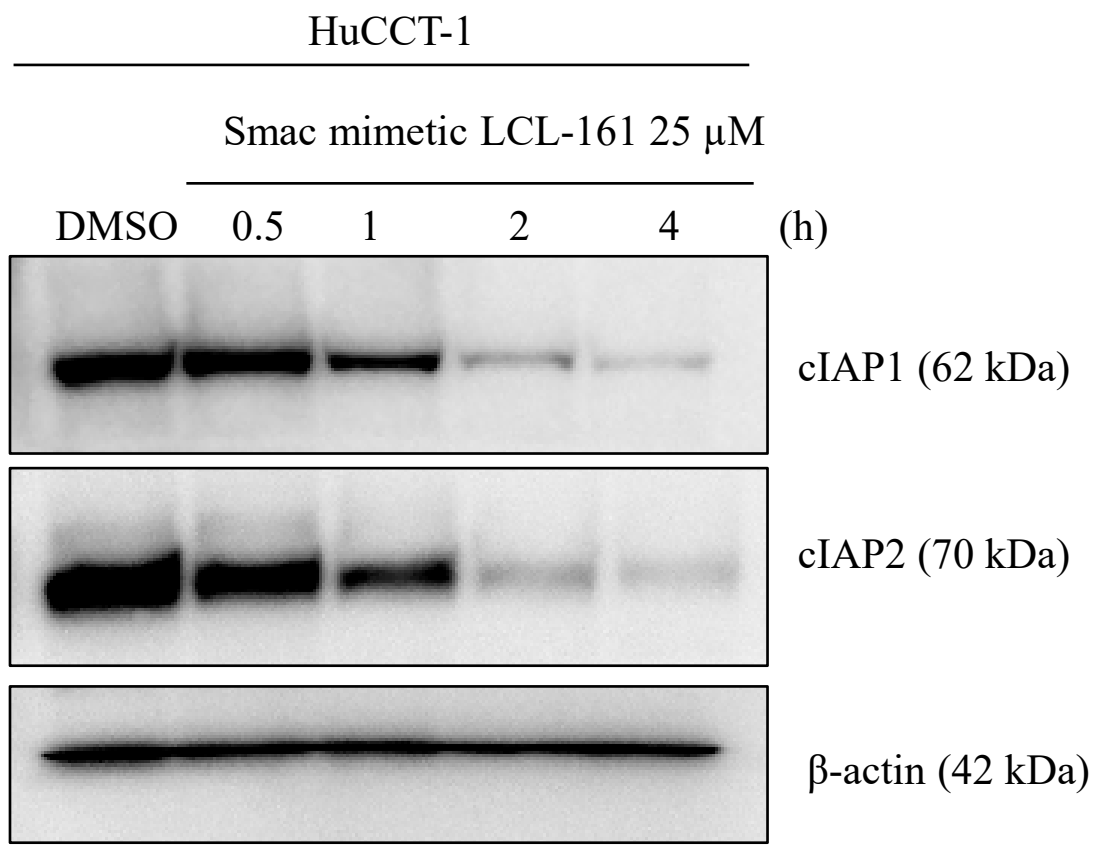

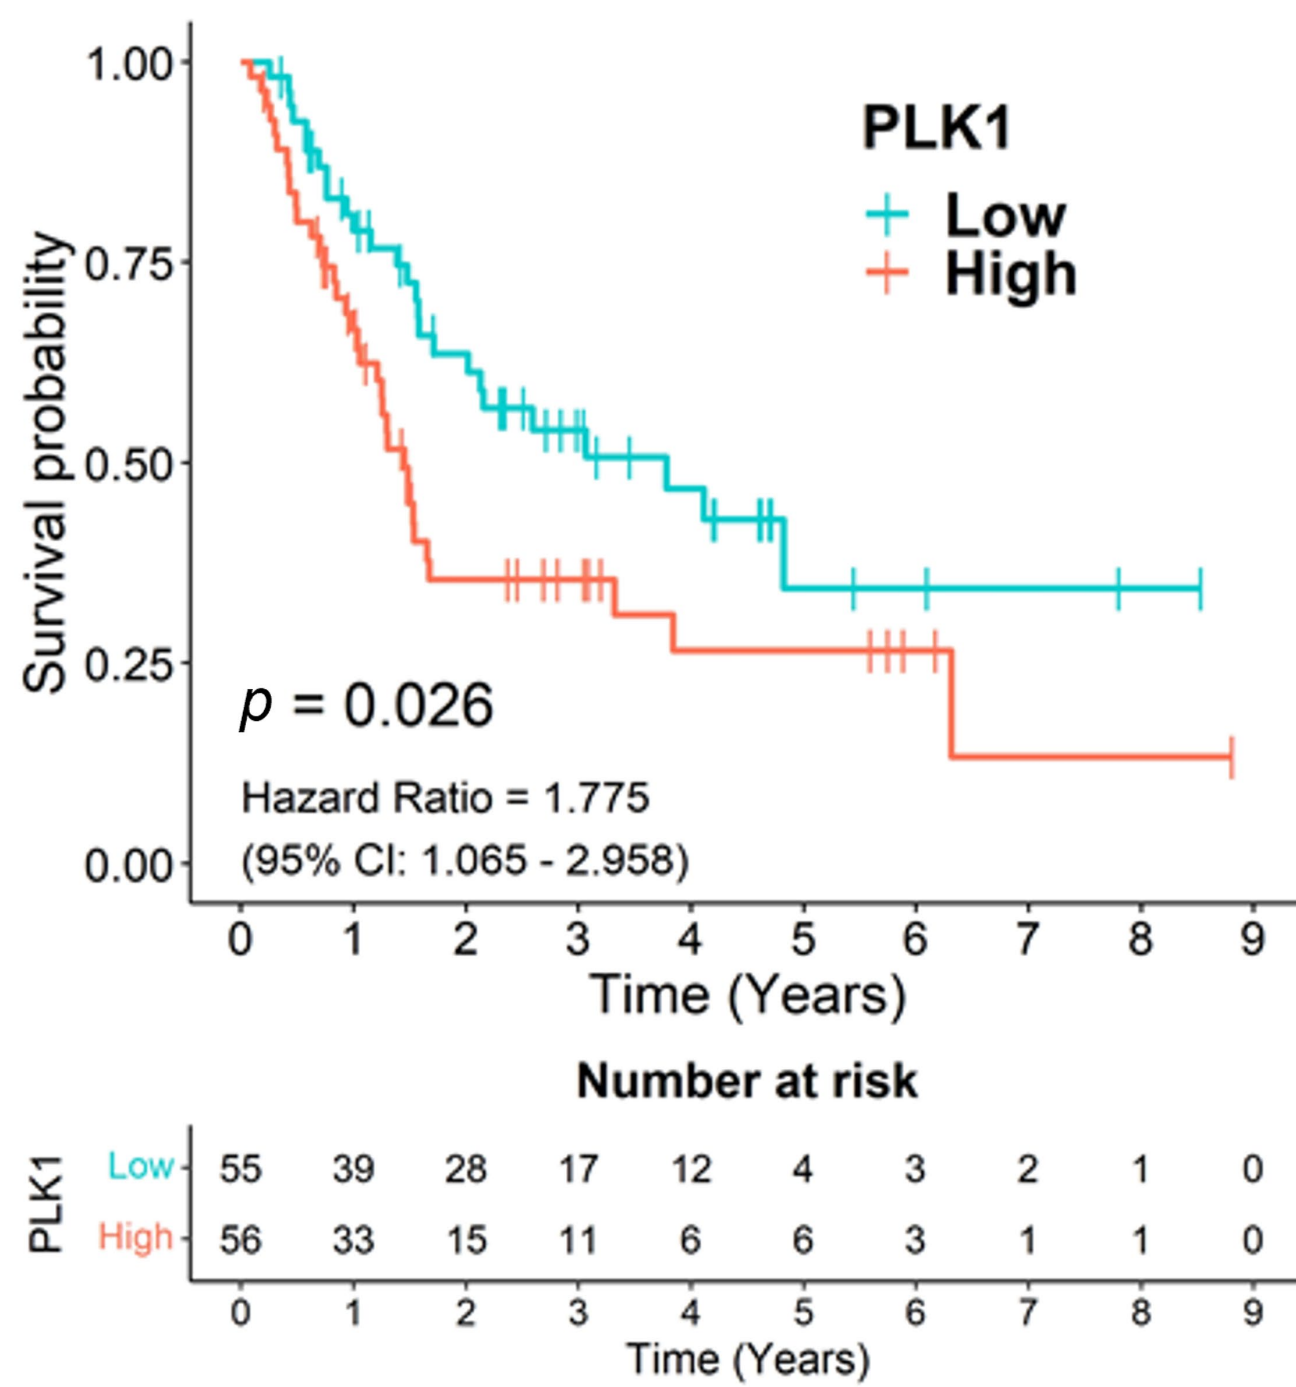

Supplement: s1 [file s1]
